# Supplementary material for: Enzymatic hydrolysis using bacterial cultures as a novel method for obtaining antioxidant peptides from brewers' spent grain
Source: Royal Society of Chemistry journal article supplement (doi:10.1039/d0ra08830g), 2021-01-01
Supplement: d0ra08830g1.pdf [file d0ra08830g1.pdf]

## Supplementary Information

### Enzymatic hydrolysis using bacterial cultures as a novel method for obtaining antioxidant peptides from brewers' spent grain

Dominika Cieurko<sup>1,\*</sup>, Wojciech Łaba<sup>1</sup>, Barbara Żarowska<sup>1</sup> and Tomasz Janek<sup>1</sup>

<sup>1</sup> Wrocław University of Environmental and Life Sciences, Department of Biotechnology and Food Microbiology, Faculty of Biotechnology and Food Science, J. Chelmońskiego 37, 51-630 Wrocław; Poland; wojciech.laba@upwr.edu.pl (W.Ł.); barbara.zarowska@upwr.edu.pl (B.Ż.); tomasz.janek@upwr.edu.pl (T.J.)

\* Correspondence: dominika.cieurko@upwr.edu.pl; Tel.: +48-71-320-7723 (D.C.)

**Table S1.** List of bioactive peptides obtained from barley proteins as a result of *in silico* analysis.

| Biological activity   | Peptide sequence | Peptide length | Peptide location | Peptide source                                 | Enzyme name                     | Molecular weight |
|-----------------------|------------------|----------------|------------------|------------------------------------------------|---------------------------------|------------------|
| Antioxidative peptide | TY               | 2              | 385-386          | globulin                                       | subtilisin                      | 282.3            |
|                       | VY               |                | 107-108          |                                                |                                 | B hordein        |
|                       |                  |                | 209-210          |                                                |                                 |                  |
|                       |                  |                | 936-937          | D hordein                                      |                                 |                  |
|                       | PQIQEQF          | 7              | 194-200          | B hordein                                      | subtilisin,<br>oligopeptidase F | 857.9            |
|                       |                  |                | 921-927          | D hordein                                      | subtilisin<br>oligopeptidase F  |                  |
|                       | IR               | 2              | 205-206          | B hordein                                      | coccolysin, thermolysin         |                  |
|                       | LK               |                | 932-933          | D hordein                                      | coccolysin,                     |                  |
|                       |                  |                | 271-272          | B hordein                                      | coccolysin, thermolysin         | 259.3            |
|                       |                  |                | 998-999          | D hordein                                      | coccolysin                      |                  |
|                       |                  |                | 266-267          | glutelin                                       | coccolysin, thermolysin         |                  |
|                       | 558-559          |                |                  |                                                |                                 |                  |
|                       | 697-698          | D hordein      | thermolysin      |                                                |                                 |                  |
|                       | LPM              | 3              | 276-278          | gamma 3 hordein                                | coccolysin, thermolysin         | 359.5            |
|                       | LKP              |                | 269-271          | glutelin                                       | oligopeptidase B                | 356.5            |
|                       | LLR              |                | 234-236          |                                                |                                 |                  |
| EL                    | 2                | 29-30          | gamma 3 hordein  | proteinase K, subtilisin ,<br>oligopeptidase F | 260.3                           |                  |

|                                    |         |                              |                 |                 |                                 |       |
|------------------------------------|---------|------------------------------|-----------------|-----------------|---------------------------------|-------|
|                                    | KP      |                              | 270-271         | glutelin        | proteinase K                    | 243.3 |
| Glucose uptake stimulating peptide | VL      | 2                            | 184-185         | B hordein       | subtilisin                      | 230.3 |
|                                    |         |                              | 257-258         | gamma 3 hordein | subtilisin,<br>oligopeptidase F |       |
|                                    |         |                              | 911-912         | D hordein       | subtilisin                      |       |
|                                    |         |                              | 6-7             |                 | subtilisin,<br>oligopeptidase F |       |
|                                    |         |                              | 278-279         | gamma 1 hordein | oligopeptidase F                |       |
|                                    |         |                              | 255-256         |                 | subtilisin                      |       |
|                                    |         |                              | 8-9             | C hordein       | subtilisin,<br>oligopeptidase F |       |
|                                    |         |                              | 228-229         | gamma 2 hordein | oligopeptidase F                |       |
|                                    | IL      | 2                            | 147-148         | B hordein       | subtilisin                      | 244.3 |
|                                    |         |                              | 874-875         | D hordein       |                                 |       |
|                                    |         |                              | 535-536         | glutelin        |                                 |       |
|                                    | LV      | 2                            | 9-10            | B hordein       | coccolysin                      | 230.3 |
|                                    |         |                              | 5-6             | D hordein       |                                 |       |
|                                    |         |                              | 15-16           |                 |                                 |       |
|                                    |         |                              | 736-737         |                 |                                 |       |
| 271-272                            |         |                              | gamma 3 hordein |                 |                                 |       |
| 106-107                            |         |                              | glutelin        |                 |                                 |       |
| IV                                 | 185-186 | coccolysin,<br>proteinase P1 |                 |                 |                                 |       |

|                                                                                              |     |   |         |                 |                                                           |          |
|----------------------------------------------------------------------------------------------|-----|---|---------|-----------------|-----------------------------------------------------------|----------|
|                                                                                              | II  |   | 208-209 | B hordein       | coccolysin                                                | 244.3    |
|                                                                                              |     |   | 12-13   | D hordein       |                                                           |          |
|                                                                                              |     |   | 935-936 |                 |                                                           |          |
|                                                                                              |     |   | 124-125 | C hordein       | proteinase P1                                             |          |
|                                                                                              |     |   | 237-238 | C hordein       |                                                           |          |
|                                                                                              |     |   | 495-496 | glutelin        |                                                           |          |
| <b>Immunostimulating peptide</b>                                                             | YG  | 2 | 139-140 | glutelin        | proteinase P1                                             | 238.2    |
| <b>Inhibitor of Prolyl Oligopeptidase</b>                                                    | VPL | 3 | 163-165 | gamma 3 hordein | subtilisin                                                | 327.4    |
| <b>CaMPDE inhibitor (Calmodulin-dependent cyclic nucleotide phosphodiesterase inhibitor)</b> | KF  | 2 | 517-518 | glutelin        | proteinase K                                              | 294.3    |
|                                                                                              |     |   | 267-268 |                 | proteinase K, subtilisin, proteinase P1, oligopeptidase F | 293.4    |
|                                                                                              |     |   | 559-560 |                 | proteinase K, subtilisin, oligopeptidase F                |          |
|                                                                                              |     |   | 572-573 |                 | proteinase K, proteinase P1                               |          |
|                                                                                              |     |   | 205-206 | B hordein       | coccolysin, thermolysin                                   | 287.3    |
|                                                                                              |     |   | 932-933 | D hordein       | coccolysin,                                               |          |
| <b>Renin inhibitor</b>                                                                       | IR  | 2 | 205-206 | B hordein       | coccolysin, thermolysin                                   | 287.3    |
|                                                                                              |     |   | 932-933 | D hordein       | coccolysin,                                               |          |
|                                                                                              |     |   | EF      |                 | 517-518                                                   | glutelin |

|                                                     |      |   |          |                 |                                                                 |       |
|-----------------------------------------------------|------|---|----------|-----------------|-----------------------------------------------------------------|-------|
|                                                     | KF   |   | 572-573  |                 | proteinase P1                                                   | 293.4 |
|                                                     |      |   | 267-268  |                 | proteinase K, subtilisin,<br>proteinase P1,<br>oligopeptidase F |       |
|                                                     |      |   | 559-560  |                 | proteinase K, subtilisin,<br>oligopeptidase F                   |       |
|                                                     |      |   | 572-573  |                 | proteinase K                                                    |       |
| <b>Stimulating vasoactive<br/>substance release</b> | SE   | 2 | 281-282  | C hordein       | V-8-protease,<br>proteinase P1                                  | 234.2 |
|                                                     |      |   | 382-383  | glutelin        | proteinase P1                                                   |       |
|                                                     | VPL  | 3 | 163-165  | gamma 3 hordein | subtilisin                                                      | 327.4 |
|                                                     | EE   | 2 | 279-280  | C hordein       | proteinase P1                                                   | 276.2 |
| 301-302                                             |      |   | glutelin |                 |                                                                 |       |
| <b>Coeliac toxic peptide</b>                        | QQQP | 4 | 60-63    | gamma 3 hordein | proteinase K                                                    | 499.5 |
|                                                     |      |   | 66-69    |                 |                                                                 |       |
|                                                     |      |   | 102-105  |                 |                                                                 |       |
|                                                     |      |   | 127-130  |                 |                                                                 |       |
|                                                     |      |   | 249-252  |                 |                                                                 |       |
| <b>Anxiolytic peptide<br/>(neuropeptide)</b>        | YL   | 2 | 162-163  | gamma 1 hordein | oligopeptidase F                                                | 294.3 |
|                                                     |      |   | 110-111  | gamma 2 hordein |                                                                 |       |

|                                                                        |     |         |                 |                                                                    |                                                  |                                 |       |
|------------------------------------------------------------------------|-----|---------|-----------------|--------------------------------------------------------------------|--------------------------------------------------|---------------------------------|-------|
| <b>ACE inhibitor<br/>(angiotensin converting<br/>enzyme inhibitor)</b> | VF  | 2       | 190-191         | glutelin                                                           | subtilisin                                       | 264.3                           |       |
|                                                                        |     |         | 483-484         |                                                                    |                                                  |                                 |       |
|                                                                        |     |         | 568-569         |                                                                    |                                                  |                                 |       |
|                                                                        |     |         | 156-157         | B hordein                                                          |                                                  |                                 |       |
|                                                                        |     |         | 261-262         |                                                                    |                                                  |                                 |       |
|                                                                        |     |         | 9-10            |                                                                    |                                                  |                                 |       |
|                                                                        | IF  |         | 3               | 5-6                                                                | globulin                                         | subtilisin,<br>oligopeptidase F | 287.3 |
|                                                                        |     |         |                 | 6-7                                                                |                                                  |                                 |       |
|                                                                        |     |         |                 | 212-213                                                            | B hordein                                        | subtilisin                      |       |
|                                                                        | VG  |         | 3               | 306-307                                                            | gamma 1 hordein<br>gamma 2 hordein<br>globulin   | subtilisin, thermolysin         | 174.2 |
|                                                                        |     |         |                 | 304-305                                                            |                                                  |                                 |       |
|                                                                        |     |         |                 | 252-253                                                            |                                                  |                                 |       |
|                                                                        |     | 58-59   |                 |                                                                    |                                                  |                                 |       |
|                                                                        | GL  | 3       | 105-106         | B hordein                                                          | subtilisin,<br>oligopeptidase F,<br>proteinase K | 188.2                           |       |
|                                                                        |     |         | 27-28           | gamma 3 hordein                                                    |                                                  |                                 |       |
|                                                                        | IL  | 3       | 535-536         | glutelin                                                           | subtilisin,                                      | 244.3                           |       |
|                                                                        |     |         | 147-148         | B hordein                                                          |                                                  |                                 |       |
|                                                                        | LQP | 3       | 263-265         | gamma 2 hordein<br>gamma 1 hordein<br>C hordein<br>gamma 3 hordein | coccolysin, thermolysin                          | 356.4                           |       |
|                                                                        |     |         | 81-83           |                                                                    | coccolysin                                       |                                 |       |
|                                                                        |     |         | 131-132         |                                                                    | coccolysin, thermolysin                          |                                 |       |
| 159-161                                                                |     |         |                 |                                                                    |                                                  |                                 |       |
| LQQ                                                                    | 3   | 237-239 | gamma 3 hordein |                                                                    | 387.4                                            |                                 |       |

|  |         |                 |                            |                 |                                              |                                |       |
|--|---------|-----------------|----------------------------|-----------------|----------------------------------------------|--------------------------------|-------|
|  |         |                 | 148-150                    | B hordein       |                                              |                                |       |
|  | FG      | 2               | 113-114                    | gamma 3 hordein | proteinase P1                                | 222.2                          |       |
|  |         |                 | 293-294                    |                 |                                              |                                |       |
|  |         |                 | 104-105                    | B hordein       | coccolysin,<br>proteinase P1,<br>thermolysin |                                |       |
|  |         |                 | 300-301                    |                 |                                              |                                |       |
|  | 134-135 |                 | C hordein                  |                 |                                              | coccolysin, thermolysin        |       |
|  | 135-136 |                 |                            |                 |                                              |                                |       |
|  | 266-267 |                 |                            |                 |                                              |                                |       |
|  | 162-162 |                 |                            |                 |                                              |                                |       |
|  | 167-168 |                 |                            |                 |                                              |                                |       |
|  | 206-207 |                 |                            | gamma 1 hordein |                                              |                                |       |
|  | 156-157 | gamma 2 hordein | coccolysin,<br>thermolysin |                 |                                              |                                |       |
|  | 50-51   | glutelin        |                            |                 |                                              |                                |       |
|  | AH      |                 | 269-270                    | B hordein       | coccolysin,<br>proteinase P1,<br>thermolysin | 226.2                          |       |
|  | GV      |                 |                            | 226-227         | B hordein                                    | proteinase P1                  | 174.2 |
|  |         |                 |                            | 307-308         |                                              | proteinase K,<br>proteinase P1 |       |
|  |         |                 |                            | 11-12           | gamma 3 hordein                              | proteinase P1                  |       |
|  |         |                 |                            | 238-239         | gamma 1 hordein                              |                                |       |
|  |         |                 |                            | 261-262         |                                              |                                |       |
|  |         |                 | 305-306                    |                 | proteinase P1,<br>proteinase K               |                                |       |

|         |           |         |                 |                                 |       |
|---------|-----------|---------|-----------------|---------------------------------|-------|
|         |           | 59-60   | globulin        | proteinase K                    |       |
|         |           | 22-23   |                 | proteinase P1                   |       |
|         |           | 59-60   |                 |                                 |       |
|         |           | 567-568 | glutelin        | proteinase K,<br>proteinase P1  |       |
|         |           | 82-83   |                 | proteinase K                    |       |
|         | AF        | 85-86   | B hordein       | proteinase P1                   | 236.3 |
|         |           | 268-269 | C hordein       |                                 |       |
|         | MF        | 176-177 | B hordein       |                                 | 296.4 |
|         |           | 292-293 |                 |                                 |       |
|         | VP        | 163-164 | gamma 3 hordein | thermolysin                     | 214.3 |
|         | GI        | 301-302 | B hordein       | proteinase K                    | 188.2 |
|         |           | 240-241 | glutelin        | proteinase P1,<br>proteinase K  |       |
|         | AI        | 11-12   | B hordein       | proteinase K                    | 202.2 |
|         |           | 205-206 | gamma 3 hordein |                                 |       |
|         |           | 187-188 | glutelin        |                                 |       |
|         | PL        | 92-93   | C hordein       | subtilisin,<br>oligopeptidase F | 228.3 |
|         |           | 174-175 |                 |                                 |       |
|         |           | 213-214 |                 |                                 |       |
|         |           | 247-248 |                 |                                 |       |
|         |           | 270-271 |                 |                                 |       |
|         |           | 293-294 |                 |                                 |       |
| 522-523 | D hordein |         |                 |                                 |       |



|  |         |  |         |                 |                                                                 |       |
|--|---------|--|---------|-----------------|-----------------------------------------------------------------|-------|
|  |         |  | 454-455 | glutelin        | subtilisin                                                      |       |
|  | TF      |  | 6-7     | C hordein       | subtilisin,<br>oligopeptidase F,<br>proteinase K                | 266.3 |
|  |         |  | 53-54   | gamma 2 hordein | subtilisin,                                                     |       |
|  |         |  | 105-106 | gamma 1 hordein | subtilisin, proteinase P1,<br>oligopeptidase F,<br>proteinase K |       |
|  |         |  | 176-177 | D hordein       | subtilisin,                                                     |       |
|  |         |  | 75-76   |                 | proteinase P1                                                   |       |
|  |         |  | FP      |                 | 66-67                                                           |       |
|  | 91-92   |  |         |                 |                                                                 |       |
|  | 173-174 |  |         |                 |                                                                 |       |
|  | 212-213 |  |         |                 |                                                                 |       |
|  | 246-247 |  |         |                 |                                                                 |       |
|  | 269-270 |  |         |                 |                                                                 |       |
|  | 292-293 |  |         |                 |                                                                 |       |
|  | 354-355 |  |         |                 |                                                                 |       |
|  | LG      |  | 10-11   | gamma 3 hordein | thermolysin                                                     | 188.2 |
|  |         |  | 239-240 | glutelin        | coccolysin, thermolysin                                         |       |
|  |         |  | 536-537 |                 |                                                                 |       |
|  |         |  | 566-567 |                 |                                                                 |       |
|  |         |  | YA      |                 | 342-343                                                         |       |
|  | FR      |  | 315-316 | 321.4           |                                                                 |       |

|  |         |  |           |          |                               |                                               |       |
|--|---------|--|-----------|----------|-------------------------------|-----------------------------------------------|-------|
|  | IG      |  | 188-189   |          |                               | 188.2                                         |       |
|  |         |  | 81-82     | glutelin | proteinase P1,<br>thermolysin |                                               |       |
|  | SY      |  |           | 42-43    | C hordein                     | proteinase P1                                 | 268.3 |
|  |         |  |           | 171-172  | D hordein                     | proteinase P1,<br>proteinase K                |       |
|  |         |  |           | 194-195  |                               | proteinase P1                                 |       |
|  |         |  |           | 337-338  |                               | proteinase P1                                 |       |
|  |         |  |           | 125-126  | gamma 1 hordein               | proteinase P1,<br>proteinase K                |       |
|  |         |  |           | 185-186  |                               | proteinase P1,<br>proteinase K                |       |
|  |         |  |           | KY       |                               | 514-515                                       |       |
|  | 320-321 |  | C hordein |          |                               | proteinase K                                  |       |
|  | TP      |  |           |          | 61-62                         |                                               | 216.2 |
|  | GS      |  |           | 140-141  | globulin                      | subtilisin                                    | 162.1 |
|  |         |  |           | 294-295  | gamma 3 hordein               |                                               |       |
|  |         |  |           | 495-496  | D hordein                     |                                               |       |
|  |         |  |           | 683-684  |                               |                                               |       |
|  | YP      |  |           | 252-253  | D hordein                     | coccolysin, thermolysin                       | 278.3 |
|  |         |  |           | 380-381  |                               |                                               |       |
|  | AV      |  |           | 10-11    | D hordein                     | coccolysin,<br>proteinase P1,<br>proteinase K | 188.2 |
|  |         |  |           | 8-9      |                               |                                               |       |
|  |         |  |           | GY       |                               | 292-293                                       |       |

|         |                                       |          |           |                         |                  |                         |                 |
|---------|---------------------------------------|----------|-----------|-------------------------|------------------|-------------------------|-----------------|
|         |                                       |          | 320-321   |                         |                  |                         |                 |
|         |                                       |          | 455-456   |                         |                  |                         |                 |
|         | AA                                    |          | 706-707   |                         |                  |                         | gamma 3 hordein |
|         | GE                                    |          | 656-657   |                         |                  |                         |                 |
|         | SG                                    |          | 26-27     |                         |                  |                         | D hordein       |
|         |                                       |          | 284-285   |                         |                  |                         |                 |
|         |                                       |          | 302-303   |                         |                  |                         |                 |
|         |                                       |          | 347-348   |                         |                  |                         |                 |
|         | 449-450                               |          |           |                         |                  |                         |                 |
|         | ST                                    |          | 362-362   |                         |                  |                         | glutelin        |
|         |                                       | 474-475  |           |                         |                  |                         |                 |
|         |                                       | 53-54    |           |                         |                  |                         |                 |
|         | YE                                    | 100-101  | D hordein |                         |                  |                         |                 |
|         | GHG                                   | 3        |           | 402-404                 |                  |                         |                 |
|         | AQLLAAQLPAMCR-<br>inhibitor z glutenu | 13       |           | 702-714                 | oligopeptidase B |                         |                 |
|         | YH                                    | 2        |           | 686-687                 | thermolysin      |                         |                 |
|         | KW                                    |          |           | 133-134                 | proteinase K     |                         |                 |
|         | HP                                    |          |           | 618-619                 |                  |                         |                 |
|         | AP                                    |          |           | 301-302                 | gamma 1 hordein  | coccolysin, thermolysin |                 |
|         |                                       |          |           | 249-250                 | gamma 2 hordein  | coccolysin,             |                 |
| 183-184 |                                       | glutelin |           | coccolysin, thermolysin |                  |                         |                 |
| 570-571 | proteinase K                          |          |           |                         |                  |                         |                 |
| GG      |                                       | 136-137  | globulin  | proteinase P1           |                  |                         |                 |
|         |                                       |          |           |                         | 160.2            |                         |                 |
|         |                                       |          |           |                         | 204.2            |                         |                 |
|         |                                       |          |           |                         | 162.1            |                         |                 |
|         |                                       |          |           |                         | 206.2            |                         |                 |
|         |                                       |          |           |                         | 310.3            |                         |                 |
|         |                                       |          |           |                         | 269.2            |                         |                 |
|         |                                       |          |           |                         | 1417.5           |                         |                 |
|         |                                       |          |           |                         | 318.3            |                         |                 |
|         |                                       |          |           |                         | 332.4            |                         |                 |
|         |                                       |          |           |                         | 352.3            |                         |                 |
|         |                                       |          |           |                         | 186.2            |                         |                 |
|         |                                       |          |           |                         | 132.1            |                         |                 |

|    |         |         |                 |                                |                                                     |       |
|----|---------|---------|-----------------|--------------------------------|-----------------------------------------------------|-------|
|    |         |         | 311-312         | gamma 1 hordein                |                                                     |       |
|    | SF      |         | 118-119         | glutelin                       | proteinase P1,<br>oligopeptidase F,<br>proteinase K | 252.3 |
|    |         |         | 119-120         |                                |                                                     |       |
|    |         |         | 578-579         |                                |                                                     |       |
|    |         |         | 10-11           |                                |                                                     |       |
|    |         | 171-172 | gamma 3 hordein | proteinase P1,<br>proteinase K |                                                     |       |
|    | YL      |         | 162-163         | gamma 1 hordein                | oligopeptidase F                                    | 294.3 |
|    | AEL     | 3       | 223-225         | globulin                       | proteinase K                                        | 331.4 |
|    | PQR     |         | 177-179         |                                | oligopeptidase B                                    | 399.4 |
|    | VRP     |         | 60-62           |                                | thermolysin                                         | 370.4 |
|    | LNP     |         | 115-117         | gamma 2 hordein                | coccolysin                                          | 342.4 |
|    | LGV     |         | 10-12           | gamma 3 hordein                |                                                     | 287.4 |
|    |         |         | 566-568         | glutelin                       |                                                     |       |
|    | LN      | 2       | 146-147         | gamma 3 hordein                | coccolysin, thermolysin                             | 245.3 |
|    |         |         | 434-435         | glutelin                       |                                                     |       |
|    | KR      |         | 186-187         | gamma 3 hordein                | proteinase P1                                       | 302.4 |
|    | GM      |         | 243-244         | glutelin                       | proteinase K                                        | 206.3 |
|    |         |         | 28-29           |                                |                                                     |       |
|    | RP      |         | 174-175         | gamma 3 hordein                |                                                     | 271.3 |
|    |         |         | 61-62           | globulin                       |                                                     |       |
| QP | 41-42   |         | gamma 3 hordein | 243.3                          |                                                     |       |
|    | 100-101 |         |                 |                                |                                                     |       |
| HG |         |         | 157-158         | globulin                       | subtilisin                                          | 212.2 |

|  |     |         |          |            |                                                                 |          |                                                  |                                |
|--|-----|---------|----------|------------|-----------------------------------------------------------------|----------|--------------------------------------------------|--------------------------------|
|  | AR  |         | 227-228  |            | coccolysin, thermolysin                                         | 245.3    |                                                  |                                |
|  | FQ  |         | 63-64    |            |                                                                 | 293.3    |                                                  |                                |
|  | YG  |         | 139-140  |            | proteinase P1                                                   | 238.2    |                                                  |                                |
|  | EV  |         | 133-134] |            |                                                                 | 246.3    |                                                  |                                |
|  | VY  |         |          |            | 189-190                                                         | glutelin | coccolysin                                       | 280.3                          |
|  | PRY | 107-108 |          | subtilisin | 434.5                                                           |          |                                                  |                                |
|  | AGP | 3       | 98-100   |            | coccolysin, thermolysin                                         | 243.3    |                                                  |                                |
|  | LKP |         | 366-368  |            |                                                                 |          | thermolysin                                      | 356.5                          |
|  | GQP |         | 269-271  |            | proteinase K                                                    | 300.3    |                                                  |                                |
|  | AQL |         | 307-309  |            |                                                                 | 330.4    |                                                  |                                |
|  | AY  |         | 24-26    |            | subtilisin                                                      | 252.3    |                                                  |                                |
|  | GF  | 547-548 | 222.2    |            |                                                                 |          |                                                  |                                |
|  | KF  | 2       | 114-115  |            | subtilisin, proteinase P1,<br>oligopeptidase F,<br>proteinase K | 293.4    |                                                  |                                |
|  |     |         | 229-230  |            |                                                                 |          | subtilisin,<br>oligopeptidase F,<br>proteinase K |                                |
|  |     |         | 267-268  |            |                                                                 |          |                                                  | proteinase P1,<br>proteinase K |
|  |     |         | AG       |            | 559-560                                                         | glutelin | coccolysin, thermolysin                          | 146.1                          |
|  |     |         |          |            | 572-573                                                         |          |                                                  |                                |
|  |     |         | 63-64    |            |                                                                 |          |                                                  |                                |
|  |     |         | 171-172  |            |                                                                 |          |                                                  |                                |

|  |    |  |          |  |  |              |       |
|--|----|--|----------|--|--|--------------|-------|
|  | IE |  | 516-517  |  |  | 260.3        |       |
|  |    |  | 90-91    |  |  |              |       |
|  | IA |  | 167-168  |  |  | 202.2        |       |
|  |    |  | 544-545  |  |  |              |       |
|  | GA |  | 537-538] |  |  | 146.1        |       |
|  | TG |  | 321-322  |  |  | 176.2        |       |
|  |    |  | 336-337  |  |  |              |       |
|  | VR |  | 232-233  |  |  | thermolysin  | 273.3 |
|  | RL |  | 233-234  |  |  | proteinase K | 287.3 |
|  | RY |  | 99-100   |  |  |              | 337.4 |
|  | HL |  | 445-446  |  |  |              | 268.3 |
|  | KP |  | 270-271  |  |  |              | 243.3 |

**Table S2.** List of bioactive peptides obtained from wheat proteins as a result of *in silico* analysis.

| Biological activity   | Peptide sequence | Peptide length | Peptide location | Peptide source    | Enzyme name             | Molecular weight |
|-----------------------|------------------|----------------|------------------|-------------------|-------------------------|------------------|
| Antioxidative peptide | TY               | 2              | 180-181          | $\beta$ -Gliadin  | subtilisin              | 282.3            |
|                       | VY               |                | 256-257          | $\alpha$ -Gliadin |                         | 280.3            |
|                       |                  |                | 305-306          | $\beta$ -Gliadin  |                         |                  |
|                       | LQPGQGQQG        | 9              | 758-766          | Glutenin          | coccolysin, thermolysin | 912.0            |
|                       | IR               | 2              | 242-243          | $\gamma$ -Gliadin | proteinase P1           | 287.3            |
|                       | LK               |                | 832-833          | Glutenin          | thermolysin             | 259.3            |
|                       |                  | 43-44          |                  |                   |                         |                  |
|                       | LWQ              | 3              | 201-203          | $\alpha$ -Gliadin | coccolysin, thermolysin | 445.5            |
|                       | LWS              |                | 152-154          | $\gamma$ -Gliadin |                         | 404.5            |
|                       | WYY              |                | 662-664          | Glutenin          | proteinase P1           | 530.6            |
|                       | SYY              |                | 124-126          |                   |                         | 431.4            |
|                       | GYY              | 3              | 155-157          | Glutenin          | proteinase P1           | 401.4            |
|                       |                  |                | 176-178          |                   |                         |                  |
|                       |                  |                | 301-303          |                   |                         |                  |
|                       |                  |                | 375-377          |                   |                         |                  |
| 390-392               |                  |                |                  |                   |                         |                  |
| 437-439               |                  |                |                  |                   |                         |                  |
| 452-454               |                  |                |                  |                   |                         |                  |
| 514-516               |                  |                |                  |                   |                         |                  |

|                                           |    |   |         |                    |                                 |       |
|-------------------------------------------|----|---|---------|--------------------|---------------------------------|-------|
|                                           |    |   | 541-543 |                    |                                 |       |
|                                           |    |   | 695-697 |                    |                                 |       |
|                                           |    |   | 710-712 |                    |                                 |       |
|                                           |    |   | 766-768 |                    |                                 |       |
|                                           |    |   | 795-797 |                    |                                 |       |
|                                           |    |   | 816-818 |                    |                                 |       |
|                                           | AH | 2 | 169-170 | $\beta$ -gliadin   | coccolysin, thermolysin         | 226.2 |
|                                           | AY |   | 178-179 | $\alpha$ -Gliadin, | proteinase K                    | 252.2 |
|                                           | KP |   | 2-3     | $\gamma$ -Gliadin  |                                 | 243.3 |
|                                           | PW |   | 338-339 | $\omega$ -Gliadin  | subtilisin                      | 301.3 |
| <b>Glucose uptake stimulating peptide</b> | VL | 2 | 246-247 | $\alpha$ -Gliadin  | subtilisin                      | 230.3 |
|                                           |    |   |         | $\gamma$ -Gliadin  | subtilisin,<br>oligopeptidase F |       |
|                                           |    |   | 175-176 | $\beta$ -Gliadin   | subtilisin                      |       |
|                                           |    |   | 162-163 |                    | subtilisin,<br>oligopeptidase F |       |
|                                           |    |   | 49-50   | $\omega$ -Gliadin  | oligopeptidase F                |       |
|                                           |    |   | 6-7     | Glutenin           |                                 |       |
|                                           | IL |   | 6-7     | $\alpha$ -Gliadin, | oligopeptidase F                | 244.3 |
| $\beta$ -Gliadin                          |    |   |         |                    |                                 |       |



|                                                                                              |         |                   |                    |                   |                              |               |
|----------------------------------------------------------------------------------------------|---------|-------------------|--------------------|-------------------|------------------------------|---------------|
|                                                                                              | LV      |                   | 9-10               | $\gamma$ -Gliadin | subtilisin                   | 230.3         |
|                                                                                              |         |                   | 245-246            |                   | Glutenin                     |               |
|                                                                                              |         |                   | 5-6                | proteinase P1     |                              |               |
|                                                                                              |         |                   | 15-16              |                   |                              |               |
|                                                                                              | 79-80   |                   | $\alpha$ -Gliadin, |                   |                              |               |
|                                                                                              | 272-273 |                   |                    | $\omega$ -Gliadin | subtilisin                   |               |
|                                                                                              | 12-13   |                   | 320-321            |                   |                              |               |
|                                                                                              | 57-58   |                   |                    | 244.3             |                              |               |
|                                                                                              | 14-15   |                   | 244.3              |                   |                              |               |
|                                                                                              | 320-321 |                   |                    | 244.3             |                              |               |
| II                                                                                           | 244.3   |                   |                    |                   |                              |               |
|                                                                                              |         | 244.3             |                    |                   |                              |               |
| <b>Inhibitor of Prolyl Oligopeptidase-antiamnestic activity</b>                              | VPL     |                   | 3                  | 209-211           | $\alpha$ -Gliadin,           | subtilisin    |
|                                                                                              |         | $\beta$ -Gliadin  |                    |                   |                              |               |
|                                                                                              |         | $\gamma$ -Gliadin |                    |                   | subtilisin, oligopeptidase F |               |
| <b>CaMPDE inhibitor (Calmodulin-dependent cyclic nucleotide phosphodiesterase inhibitor)</b> | KF      | 2                 | 291-292            | $\omega$ -Gliadin | proteinase P1,               | 293.4         |
|                                                                                              | IR      |                   | 242-243            | $\gamma$ -Gliadin |                              | 287.3         |
| <b>Renin inhibitor</b>                                                                       | IR      | 2                 | 242-243            |                   |                              | proteinase P1 |

|                                          |                  |            |                   |                                     |                                              |       |
|------------------------------------------|------------------|------------|-------------------|-------------------------------------|----------------------------------------------|-------|
|                                          | KF               |            | 291-292           |                                     |                                              | 293.4 |
| Stimulating vasoactive substance release | SE               | 2          | 26-27             | Glutenin                            | proteinase P1                                | 234.2 |
|                                          | VPL              | 3          | 209-211           | $\alpha$ -Gliadin                   | subtilisin                                   | 327.4 |
|                                          |                  |            |                   | $\gamma$ -Gliadin                   | subtilisin,<br>oligopeptidase F              |       |
| 39-41                                    | $\beta$ -Gliadin | subtilisin |                   |                                     |                                              |       |
| Antiinflammatory peptide                 | IPP              | 3          | 300-302           | $\alpha$ -Gliadin, $\beta$ -Gliadin | coccolysin, thermolysin                      | 325.4 |
|                                          |                  |            | 186-188           | $\omega$ -Gliadin                   |                                              |       |
|                                          |                  |            | 251-253           |                                     |                                              |       |
|                                          |                  |            | 259-261           |                                     |                                              |       |
|                                          | 275-277          |            |                   |                                     |                                              |       |
| YPP                                      |                  | 258-260    | $\gamma$ -Gliadin | thermolysin                         | 311.4                                        |       |
| Alpha-glucosidase inhibitor              | YP               | 2          | 251-252           | $\alpha$ -Gliadin, $\beta$ -Gliadin | coccolysin, thermolysin                      | 278.3 |
| Pain regulation - analgesic effect       | YR               | 2          | 280-281           | $\gamma$ -Gliadin                   | coccolysin,<br>proteinase P1,<br>thermolysin | 337.4 |
| Opioid delta receptor ligand             | GYG              | 3          | 155-157           | Glutenin                            | proteinase P1,                               | 401.4 |
|                                          |                  |            | 176-178           |                                     |                                              |       |
|                                          |                  |            | 301-303           |                                     |                                              |       |
|                                          |                  |            | 375-377           |                                     |                                              |       |

|                       |                                                               |             |         |                                      |                   |             |                                 |
|-----------------------|---------------------------------------------------------------|-------------|---------|--------------------------------------|-------------------|-------------|---------------------------------|
|                       |                                                               |             | 390-392 |                                      |                   |             |                                 |
|                       |                                                               |             | 437-439 |                                      |                   |             |                                 |
|                       |                                                               |             | 452-454 |                                      |                   |             |                                 |
|                       |                                                               |             | 514-516 |                                      |                   |             |                                 |
|                       |                                                               |             | 541-543 |                                      |                   |             |                                 |
|                       |                                                               |             | 695-697 |                                      |                   |             |                                 |
|                       |                                                               |             | 710-712 |                                      |                   |             |                                 |
|                       |                                                               |             | 766-768 |                                      |                   |             |                                 |
|                       |                                                               |             | 795-797 |                                      |                   |             |                                 |
|                       |                                                               |             | 816-818 |                                      |                   |             |                                 |
| Celiac toxic peptides | QQPY                                                          | 4           | 74-77   | $\alpha$ -Gliadin                    | subtilisin        | 534.5       |                                 |
|                       | YPQPQ                                                         | 5           | 90-94   |                                      | $\gamma$ -Gliadin | thermolysin | 631.7                           |
|                       |                                                               |             | 97-101  |                                      |                   |             |                                 |
|                       | QQQP                                                          | 4           | 15-18   | $\omega$ -Gliadin                    | proteinase K      | 499.5       |                                 |
|                       |                                                               |             | 116-119 |                                      |                   |             |                                 |
|                       | ACE inhibitor<br>(angiotensin converting<br>enzyme inhibitor) | VY          | 2       | 298-299                              | $\alpha$ -Gliadin | subtilisin  | 280.3                           |
| 256-257               |                                                               |             |         | $\alpha$ -Gliadin, $\gamma$ -Gliadin |                   |             |                                 |
| 305-306               |                                                               |             |         | $\beta$ -Gliadin                     |                   |             |                                 |
| PL                    |                                                               | 252-253     |         | $\alpha$ -Gliadin                    | 228.3             |             |                                 |
|                       |                                                               | 443-444     |         | Glutenin                             |                   |             |                                 |
|                       |                                                               | 547-548     |         |                                      |                   |             |                                 |
|                       |                                                               | 701-702     |         |                                      |                   |             |                                 |
|                       |                                                               | 330-331     |         | $\omega$ -Gliadin                    |                   |             | subtilisin,<br>oligopeptidase F |
| KY                    | 9-10                                                          | subtilisin, | 309.3   |                                      |                   |             |                                 |

|  |         |                  |                         |                   |                                      |                                 |                                          |
|--|---------|------------------|-------------------------|-------------------|--------------------------------------|---------------------------------|------------------------------------------|
|  |         |                  | 110-111                 | $\beta$ -Gliadin  | proteinase K                         |                                 |                                          |
|  |         |                  |                         |                   | proteinase P1,<br>proteinase K       |                                 |                                          |
|  | VP      |                  |                         | 39-40             | $\alpha$ -Gliadin                    | thermolysin                     | 214.3                                    |
|  |         |                  |                         | 20-21             |                                      | subtilisin, thermolysin         |                                          |
|  |         |                  |                         | 23-24             |                                      |                                 |                                          |
|  |         |                  |                         | 42-43             | $\gamma$ -Gliadin                    | thermolysin                     |                                          |
|  |         |                  |                         | 209-210           |                                      |                                 |                                          |
|  | GS      |                  | 180-181                 | $\alpha$ -Gliadin | subtilisin                           | 162.1                           |                                          |
|  | AI      |                  | 11-12                   |                   | subtilisin,<br>proteinase K          | 202.2                           |                                          |
|  | VR      |                  |                         | 18-19             | $\beta$ -Gliadin                     | subtilisin, thermolysin         | 273.3                                    |
|  |         |                  |                         | 21-22             | $\alpha$ -Gliadin                    |                                 |                                          |
|  | IL      |                  |                         | 6-7               | $\alpha$ -Gliadin , $\beta$ -Gliadin | subtilisin,<br>oligopeptidase F | 244.3                                    |
|  | YP      |                  |                         | 251-252           | $\alpha$ -Gliadin                    | coccolysin, thermolysin         | 278.3                                    |
|  | AP      |                  |                         | 307-308           |                                      |                                 | coccolysin, thermolysin,<br>proteinase K |
|  |         |                  |                         | 267-268           | $\alpha$ -Gliadin, $\gamma$ -Gliadin | coccolysin, thermolysin,        |                                          |
|  |         |                  |                         | 148-149           | $\omega$ -Gliadin                    | proteinase K                    |                                          |
|  |         |                  |                         | 163-164           |                                      |                                 |                                          |
|  |         |                  |                         | 231-232           |                                      |                                 |                                          |
|  |         |                  |                         | 278-279           |                                      |                                 |                                          |
|  | 316-317 | $\beta$ -Gliadin | coccolysin, thermolysin |                   |                                      |                                 |                                          |

|        |    |                  |         |                    |  |                                |       |
|--------|----|------------------|---------|--------------------|--|--------------------------------|-------|
|        | FG |                  | 309-310 | $\alpha$ -Gliadin, |  | 222.2                          |       |
|        |    |                  | 318-319 | $\beta$ -Gliadin   |  |                                |       |
|        | LQ |                  | 78-79   | $\alpha$ -Gliadin, |  | 259.3                          |       |
|        |    |                  | 702-703 | Glutenin           |  |                                |       |
|        |    |                  | 75-76   | $\beta$ -Gliadin   |  |                                |       |
|        |    |                  | 193-194 |                    |  |                                |       |
|        | AH |                  | 169-170 |                    |  | 226.2                          |       |
|        | FR |                  | 110-111 | $\alpha$ -Gliadin, |  | proteinase P1                  | 321.4 |
|        |    |                  | 265-266 | $\gamma$ -Gliadin  |  | coccolysin, thermolysin        |       |
|        | SF |                  | 113-114 |                    |  | proteinase P1,                 | 252.3 |
|        |    |                  | 243-244 | $\alpha$ -Gliadin, |  | proteinase P1,<br>proteinase K |       |
|        |    |                  | 257-258 |                    |  | proteinase P1                  |       |
|        |    |                  | 97-98   | $\beta$ -Gliadin   |  | proteinase P1,<br>proteinase K |       |
|        |    |                  | 250-251 |                    |  |                                |       |
|        |    |                  | 264-265 |                    |  |                                |       |
|        | QP |                  | 29-30   | $\alpha$ -Gliadin, |  | proteinase K                   | 243.2 |
|        |    |                  | 65-66   |                    |  |                                |       |
|        |    |                  | 67-68   |                    |  |                                |       |
|        |    |                  | 81-82   |                    |  |                                |       |
|        |    |                  | 85-86   |                    |  |                                |       |
| 92-93  |    |                  |         |                    |  |                                |       |
| 99-100 |    |                  |         |                    |  |                                |       |
| 26-27  |    | $\beta$ -Gliadin |         |                    |  |                                |       |

|  |  |  |         |                                      |  |
|--|--|--|---------|--------------------------------------|--|
|  |  |  | 62-63   |                                      |  |
|  |  |  | 64-65   |                                      |  |
|  |  |  | 78-79   |                                      |  |
|  |  |  | 82-83   |                                      |  |
|  |  |  | 84-85   |                                      |  |
|  |  |  | 94-95   |                                      |  |
|  |  |  | 113-114 |                                      |  |
|  |  |  | 266-267 |                                      |  |
|  |  |  | 279-280 |                                      |  |
|  |  |  | 223-224 |                                      |  |
|  |  |  | 549-550 | Glutenin                             |  |
|  |  |  | 759-760 |                                      |  |
|  |  |  | 786-787 |                                      |  |
|  |  |  | 106-107 | $\alpha$ -Gliadin, $\gamma$ -Gliadin |  |
|  |  |  | 108-109 | $\alpha$ -Gliadin,                   |  |
|  |  |  | 259-260 |                                      |  |
|  |  |  | 272-273 |                                      |  |
|  |  |  | 21-22   | $\gamma$ -Gliadin                    |  |
|  |  |  | 36-37   |                                      |  |
|  |  |  | 51-52   |                                      |  |
|  |  |  | 61-62   |                                      |  |
|  |  |  | 232-233 |                                      |  |
|  |  |  | 332-333 | $\omega$ -Gliadin                    |  |
|  |  |  | 340-341 |                                      |  |
|  |  |  | 356-357 |                                      |  |

|    |         |                         |         |                    |                                |                             |
|----|---------|-------------------------|---------|--------------------|--------------------------------|-----------------------------|
|    | AV      |                         | 10-11   | Glutenin           | proteinase P1,<br>proteinase K | 188.2                       |
|    | GI      |                         | 20-21   | $\alpha$ -Gliadin, | proteinase K                   |                             |
|    |         |                         | 310-311 |                    | proteinase P1                  |                             |
|    |         |                         | 222-223 | $\gamma$ -Gliadin  |                                |                             |
|    |         |                         | 319-320 | $\beta$ -Gliadin   |                                |                             |
|    |         |                         | 105-106 | Glutenin           | proteinase K                   |                             |
|    | RP      |                         | 111-112 | $\alpha$ -Gliadin, |                                | 271.3                       |
|    | AY      |                         | 178-179 |                    | 252.2                          |                             |
|    | QG      |                         | 203-204 | $\gamma$ -Gliadin  | subtilisin                     | 203.2                       |
|    | TF      |                         | 264-265 |                    | proteinase P1                  | 266.3                       |
|    |         |                         | 40-41   |                    |                                |                             |
|    |         |                         | 17-18   | $\omega$ -Gliadin  | proteinase K                   |                             |
|    | TP      |                         | 120-121 |                    |                                | 216.2                       |
|    | AG      |                         | 274-275 | $\gamma$ -Gliadin  | coccolysin, thermolysin        | 146.1                       |
|    | IR      |                         | 242-243 |                    | proteinase P1                  | 287.3                       |
|    | IF      |                         | 33-34   |                    |                                |                             |
|    | GV      |                         | 204-205 |                    |                                | 174.2                       |
|    | EV      |                         | 240-241 |                    | proteinase P1,<br>proteinase K | 246.2                       |
|    | YV      |                         | 257-258 |                    | proteinase P1                  | 280.3                       |
|    | HY      |                         | 19-20   |                    | $\omega$ -Gliadin              | subtilisin,<br>proteinase K |
| IP | 132-133 | coccolysin, thermolysin | 228.3   |                    |                                |                             |

|    |    |         |         |           |                  |               |               |
|----|----|---------|---------|-----------|------------------|---------------|---------------|
|    |    |         | 175-176 |           |                  |               |               |
|    |    |         | 106-107 | Glutenin  |                  |               |               |
|    | YK |         | 8-9     | ω-Gliadin |                  | 309.3         |               |
|    | FP |         | 307-308 |           |                  | 262.3         |               |
|    | KF |         | 291-292 |           |                  | 293.4         |               |
|    | RF |         | 282-283 |           |                  | proteinase P1 | 321.4         |
|    | ST |         | 92-93   |           |                  | 206.2         |               |
|    | QK |         | 290-291 |           | oligopeptidase B | 274.3         |               |
|    | HK |         | 38-39   |           |                  | 283.3         |               |
|    | NF |         | 22-23   |           | proteinase K     | 279.3         |               |
|    | KP |         | 2-3     |           |                  | 243.3         |               |
|    | SG |         |         |           | 149-150          | Glutenin      | proteinase P1 |
|    |    |         |         | 295-296   |                  |               |               |
|    |    |         |         | 384-385   |                  |               |               |
|    |    |         |         | 446-447   |                  |               |               |
|    |    |         |         | 461-462   |                  |               |               |
|    |    |         |         | 523-524   |                  |               |               |
|    |    |         |         | 671-672   |                  |               |               |
|    |    |         |         | 733-734   |                  |               |               |
|    |    |         |         | 748-749   |                  |               |               |
|    |    |         | 775-776 |           |                  |               |               |
|    |    |         | 810-811 |           |                  |               |               |
| TG |    | 804-805 |         | 176.2     |                  |               |               |
| KG |    | 478-479 |         | 203.2     |                  |               |               |



|         |         |           |                         |       |  |              |       |
|---------|---------|-----------|-------------------------|-------|--|--------------|-------|
|         | GR      |           | 203-204                 |       |  | 231.2        |       |
|         | AA      |           | 829-830                 |       |  | 160.2        |       |
|         | YE      |           | 841-842                 |       |  | 310.3        |       |
|         | YH      |           | 75-76                   |       |  | 318.3        |       |
|         | GE      |           | 821-822                 |       |  | 204.2        |       |
|         | SY      |           | 23-24                   |       |  | 268.3        |       |
|         | GY      |           | 124-125                 |       |  | proteinase K | 238.2 |
|         |         |           | 176-177                 |       |  |              |       |
|         |         |           | 212-213                 |       |  |              |       |
|         |         |           | 301-302                 |       |  |              |       |
|         |         |           | 375-376                 |       |  |              |       |
|         |         |           | 390-391                 |       |  |              |       |
|         |         |           | 437-438                 |       |  |              |       |
|         |         |           | 452-453                 |       |  |              |       |
|         |         | 514-515   |                         |       |  |              |       |
|         |         | 541-542   |                         |       |  |              |       |
|         | IAY     | 556-557   | subtilisin              | 365.4 |  |              |       |
|         |         | 695-696   |                         |       |  |              |       |
|         | IPP     | 316-317   | coccolysin, thermolysin | 325.4 |  |              |       |
|         |         | 177-179   |                         |       |  |              |       |
|         |         | 300-302   |                         |       |  |              |       |
| 186-188 |         |           |                         |       |  |              |       |
|         | 251-253 | ω-Gliadin |                         |       |  |              |       |
|         | 259-261 |           |                         |       |  |              |       |
|         |         |           |                         |       |  |              |       |
|         | 3       |           |                         |       |  |              |       |

|  |               |    |         |                   |                   |                  |        |
|--|---------------|----|---------|-------------------|-------------------|------------------|--------|
|  |               |    | 275-277 |                   |                   |                  |        |
|  | LQP           |    | 77-79   | $\beta$ -Gliadin  |                   | 356.4            |        |
|  | LQQ           |    |         | 80-82             | $\alpha$ -Gliadin |                  | 387.4  |
|  |               |    |         | 156-158           |                   |                  |        |
|  |               |    |         | 248-250           |                   |                  |        |
|  |               |    |         | 307-309           | Glutenin          |                  |        |
|  |               |    |         | 147-149           | $\beta$ -Gliadin  |                  |        |
|  |               |    | 184-186 |                   |                   |                  |        |
|  | VPP           |    | 258-260 | $\gamma$ -Gliadin | thermolysin       | 311.4            |        |
|  | TTN           |    |         | 122-124           | $\omega$ -Gliadin | proteinase P1    | 334.3  |
|  |               |    |         | 165-167           |                   |                  |        |
|  | VSP           |    |         | 66-68             | Glutenin          | thermolysin      | 301.3  |
|  | AQQLAAQLPAMCR | 13 |         | 837-849           |                   | oligopeptidase B | 1417.5 |
